# Supplementary material for: Two Novel lncRNAs Regulate Primordial Germ Cell Development in Zebrafish
Source: MDPI journal article supplement (doi:10.3390/cells12040672), 2023-02-20
Supplement: s1 [file s1]

| Description           | Primer Name            | Primer Sequence (5'-3')                          |
|-----------------------|------------------------|--------------------------------------------------|
| pCS2 + mRNA synthesis | <i>lnc196</i> -EcoR1-F | ACCGAATTCATCCCCGGAGCGCCTAGCCTA                   |
|                       | <i>lnc196</i> -Not1-R  | CCCGCGGCCGCTTGCAAAAGAAAAACATTTTATTTGA<br>AAACAT  |
| qRT-PCR               | <i>lnc304</i> -BamH1-F | CGCGGATCCGCGGCAAAGTAGCGAGGGAATC                  |
|                       | <i>lnc304</i> -EcoR1-R | CCGGAATTCCGGTGGTGTTCCTTGGTCCTC                   |
|                       | <i>lnc172</i> -BamH1-F | CGCGGATCCCATGAACACTCGCTGTCCAG                    |
|                       | <i>lnc172</i> -Xho1-R  | CCGCTCGAGTATTTACCACATCACTGCAG                    |
|                       | <i>ef1a</i> -RT-F      | GGCTGACTGTGCTGTGCTGATTG                          |
|                       | <i>ef1a</i> -RT-R      | CTTGTCGGTGGGACGGCTAGG                            |
|                       | <i>rpl13a</i> -RT-F    | TCTGGAGGACTGTAAGAGGTATGC                         |
|                       | <i>rpl13a</i> -RT-R    | AGACGCACAATCTTGAGAGCAG                           |
|                       | <i>vasa</i> -RT-F      | GAGCATGCAGTGATGTGGAG                             |
|                       | <i>vasa</i> -RT-R      | CCGATCACCATGGATGCTTG                             |
|                       | <i>dnd</i> -RT-F       | GGCTAAGAAAGTGCTCGTGG                             |
|                       | <i>dnd</i> -RT-R       | GCTGGGACGTCATAATGCAG                             |
|                       | <i>lnc196</i> -RT-F    | AAGGTGGCGTCAATACTGGA                             |
|                       | <i>lnc196</i> -RT-R    | TGGTTCCTGATGCACGGATA                             |
|                       | <i>lnc304</i> -RT-F    | AGGGCCTAACAAGTTGAA                               |
|                       | <i>lnc304</i> -RT-R    | TCCCAGCCACAGGATGAC                               |
|                       | <i>lnc172</i> -RT-F    | CCGAATCCTCATGTCTGCTT                             |
|                       | <i>lnc172</i> -RT-R    | TACCACATCACTGCACGACA                             |
|                       | <i>lnc370</i> -RT-F    | GCAGCACACAGGAGACTGAA                             |
|                       | <i>lnc370</i> -RT-R    | GAGCTGCATGAGCTGAACTG                             |
|                       | <i>lnc279</i> -RT-F    | TCATCGTCCAGGAAGTGACA                             |
|                       | <i>lnc279</i> -RT-R    | ATGGTTCAGCTTCCTGCTGT                             |
|                       | <i>lnc181</i> -RT-F    | CAGATGTGGTGGTGTGGAG                              |
|                       | <i>lnc181</i> -RT-R    | AGAGCTGGGAACAGGACAGA                             |
|                       | <i>lnc114</i> -RT-F    | CAGCGTACGGATCTCACAGA                             |
|                       | <i>lnc114</i> -RT-R    | AAACGCCAGTGGGTCACTAC                             |
|                       | <i>lnc308</i> -RT-F    | GTTGTGATGGAGCTGGACCT                             |
|                       | <i>lnc308</i> -RT-R    | CAGAACTGCTGCTGTCTTGC                             |
|                       | <i>lnc345</i> -RT-F    | GCACATATTTAGCCCATCA                              |
|                       | <i>lnc345</i> -RT-R    | GGAGGATGTGAAGCTCAGGA                             |
| DIG-probe             | <i>lnc196</i> -F       | GGTGGCTGATTAGAGACGGA                             |
|                       | <i>lnc196</i> -R-T7    | TAATACGACTCACTATAGCTGTTTTAGTCCTTTGGTCCA          |
|                       | <i>lnc304</i> -F       | CCCCAGAGCAGTCTAACCTT                             |
|                       | <i>lnc304</i> -R-T7    | TAATACGACTCACTATAGGTGTTTCCTTGGTCCTCC             |
|                       | <i>lnc172</i> -F       | CATGAACACTCGCTGTCCAG                             |
|                       | <i>lnc172</i> -R-T7    | AATACGACTCACTATATTTACCACATCACTGCACGA<br>CACAACAC |

>*lnc196*

ATCCCCGGAGCGCCTAGCCTACTCTGCCCCGGATGCTAACGGCAACACAGGACGGTTTC  
CATAAGCTCTGGAGAGTTTCTAAAACATATCTGCCACAGTTCTCTATACAATAACACAA  
GACCCTGTGTCGGTGGCTGATTAGAGACGGATGGTGTATTTCCAGAGTTGGTGAAATG  
ACCAAGCACACCTTCTTGGTCATATGTGGTGATAATAATGAAGTTAAGATTATATTTGGA  
CCTGAAACATCTGCTAGACTCCAGGAAAGGTGGCGTCAATACTGGACCTGAAAGGGCT  
TAACAAGTTGAATCTGCTGGGAGAGTCAAGTTGTGGATCATCATGAAGATTTTCAAAA  
GGCGAGTTTAGATTCTTGAATGTTTTATTTACTTTAAATGTTCTTTTAAATATATCATAG  
AATTTGATTGCAATTTGTTTTCAAACATTTTTCTTAGTCATGCTGAAGTCTTGAAGAGTT  
CTTAGATGAGCATCACCTATTTCCGTGCATCAGGAACCAGCAGTCGAGGGATCAGCA  
GCTACTACATCGTCATGGATAAAGGTCACCCTGTGGCTGGGAAGCACTTCATTCACAGG  
ACATGTTTGATGAGATTTCTAGCTCCAGTTTGTTTTCACACAAGTTTACAGCATTGTGA  
CCTTCATTAAACTGCTGTGTTTGATATGGAGGACCAAGGAAAAACACCAGAAGTGAA  
AGATTTGCACGCCAAGTTGTTTAAAATGTAATTCAGAAGAAAACATATGCGCTCAGAA  
GAAAACATGAGTGACGATACTGTATATTGAACTTTCAAATTGCTCTGATGAAACATAA  
AGTTTGACCAAAGGACTAAAACAGCCATTTTGAGCACTGGTCATACATATTTTGTTGA  
TACTGTCTGTACTAATAAAACATTTAAAGCATATTTGACATTGTTGCATTTTAAAACTG  
AATGAATTGTTGAAGTGGTGAATGTTTTCAAATAAAATGTTTTTCTTTTGCAA

>*lnc304*

GCAAAC TAGCGAGGGAATCCCCTGAGCAGCCTAGCCTACTCTGCCCCGGATGCTAACGG  
CAACACAGGACGGTTTCCATAAGCTCTGGAGAGTTTCTAAAACATGTCTGCCACAGTT  
CTCTATACAATAACACAAGACCCTGTGACGGTGGCTGATTAGAGACGGATGGTGTATTT  
CCAGAGTTGGTGAAATGACCAAGCACACCTTCTTGGTCATATGTGGTGATAATAATGAA  
GATTCTATTTTGACCTGAAACATCTGCTGGACTCCAGGAAAGGTGGCGTCAATACTGG  
ACCTGAAAGGGCCTAACAAGTTGAATCTGCTGGGAGAGTCAAGTTGTGGATCATCATG  
TAGATTTTCAAAGTAATGCTGGAGTCTTGAAGAGTTCTCAGATGAGCATCACCTATA  
TCCGTGCATCAGGAACCACCAGATGAGCGATCAGCAGCTACTACATCGTCATGGATAA  
AAAGGTCATCCTGTGGCCGGGAAGCACTTCATTCACAGGACATGCTTGATGAAATTC  
CTAGCTCCAGTTTGTTTTACATAAGTTTACAGCATTATACCTTCATTTAACTGCTGT  
GTTTGATGTGGAGGACCAAGGAAACACCAGAAGTGAAAGATTTGCACGCCAAGTTGT  
TTAAAATGTAATTTCAGAAGAAAACATATGCGTTCAGAAGAAAACATGAGTGACGATAT  
ATTGAACTTTCAAATTGCTCTGATGAAACATCAAGTTTGGACCAAAGGACTGAAACAG  
CTTTTTTGAGCACTTGTCGTACATACTTTGTTGATACTGTCTGTACTAATAAAACATTTA  
AAGCTAAAAAAAAAAAAAAAAAAGTACTCTGCGTTGATACCACTGCTT

>*lnc172*

CATGAACACTCGCTGTCCAGCCTGGTGTGACCGAATCCTCATGTCTGCTTCGGCCAAA  
GACCTGATCGGCAAGCCGGAGAACGAGGACAAATCAATAACATACGACAACATCGGA  
GCCAACGTGTGTATGGGAGACCACAAGCCGGTCTACTTGTTCTTTTCGGTTGACCACAG  
GTCCAGGTAAACCTAATGCAAATAAGCACAAGTGTTGTGTCGTGCAGTGATGTGGTAA  
ATA
